# Supplementary figures and images for: Characterizing the admixed African ancestry of African Americans
Source: Springer Nature journal article supplement (doi:10.1186/gb-2009-10-12-r141), 2009-12-22

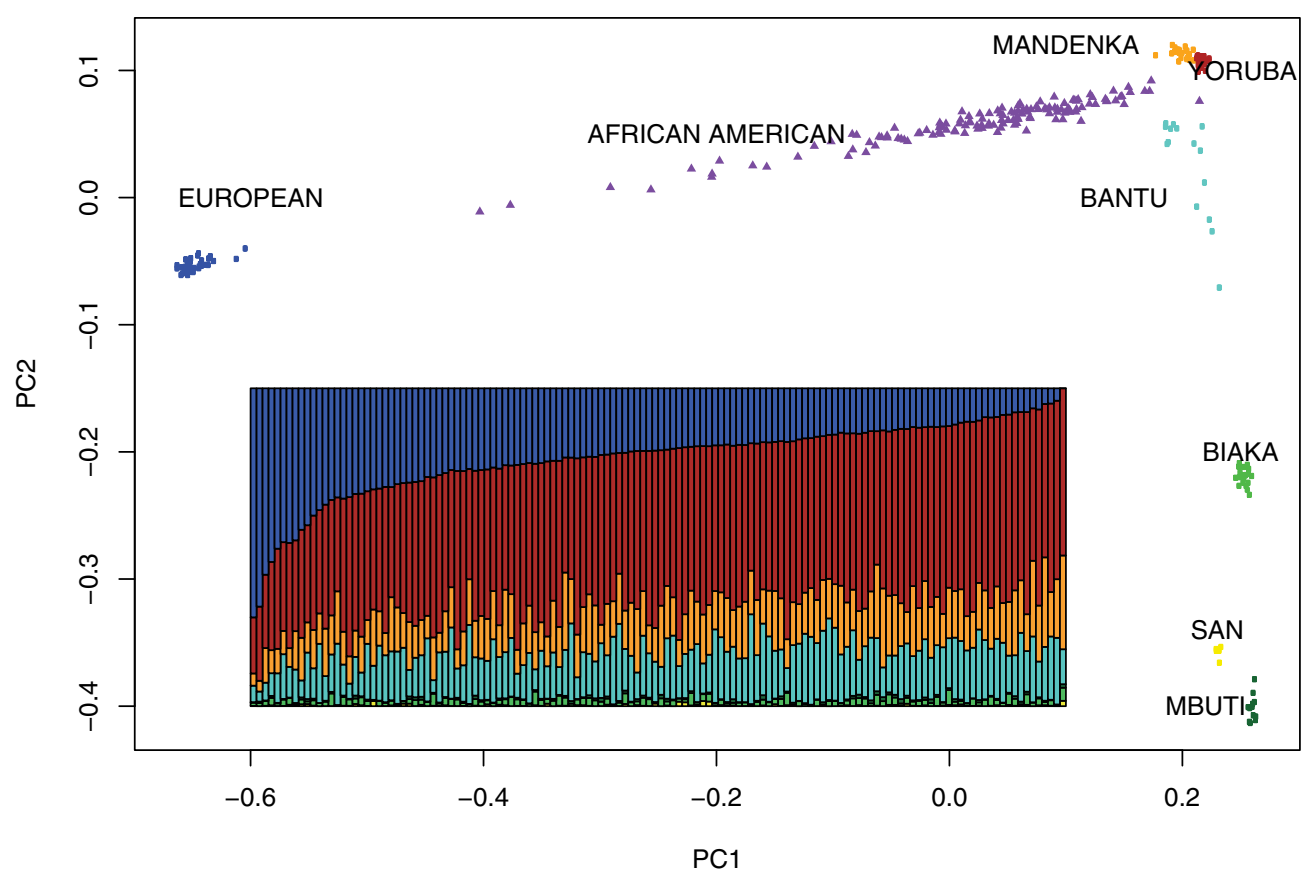

Supplement: 13059_2009_2291_MOESM2_ESM.pdf [file 13059_2009_2291_MOESM2_ESM.pdf]

**(a)**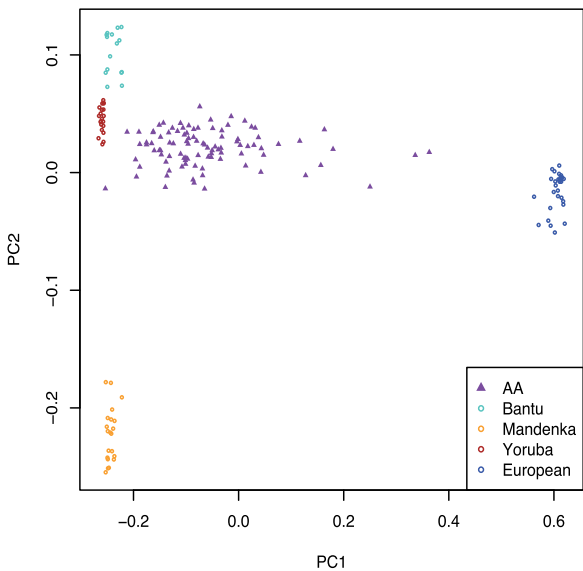**(b)**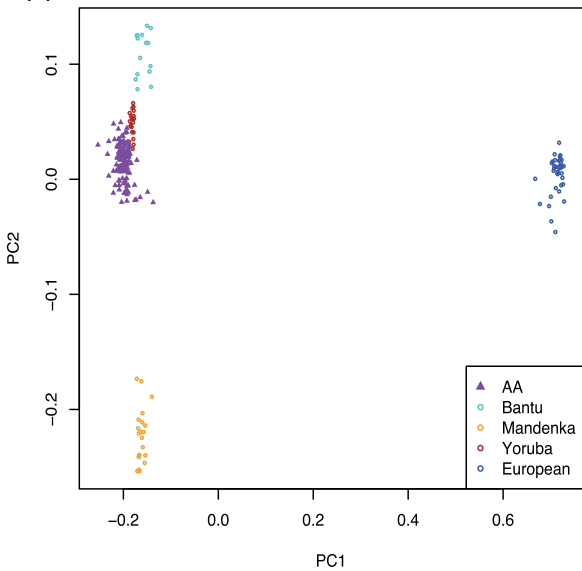

Supplement: 13059_2009_2291_MOESM3_ESM.pdf [file 13059_2009_2291_MOESM3_ESM.pdf]

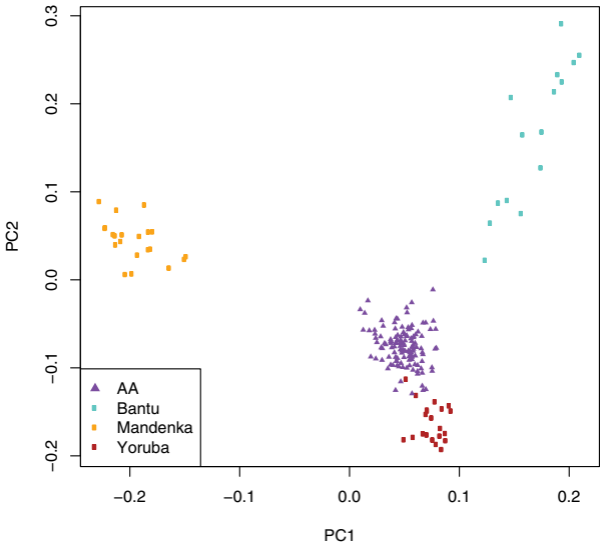

Supplement: 13059_2009_2291_MOESM4_ESM.pdf [file 13059_2009_2291_MOESM4_ESM.pdf]

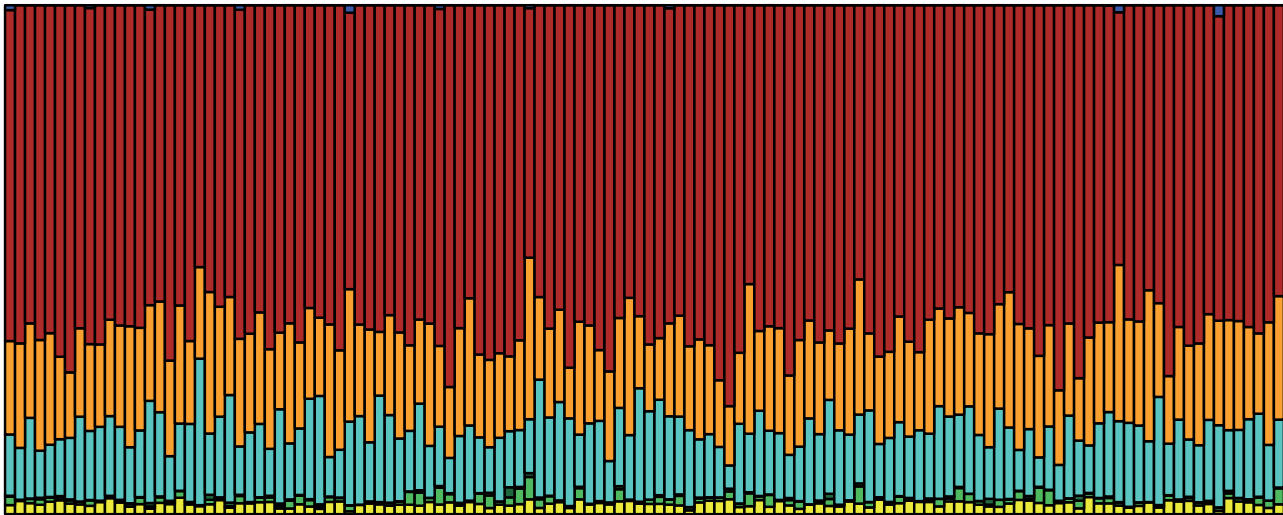

Individual

Supplement: 13059_2009_2291_MOESM5_ESM.pdf [file 13059_2009_2291_MOESM5_ESM.pdf]

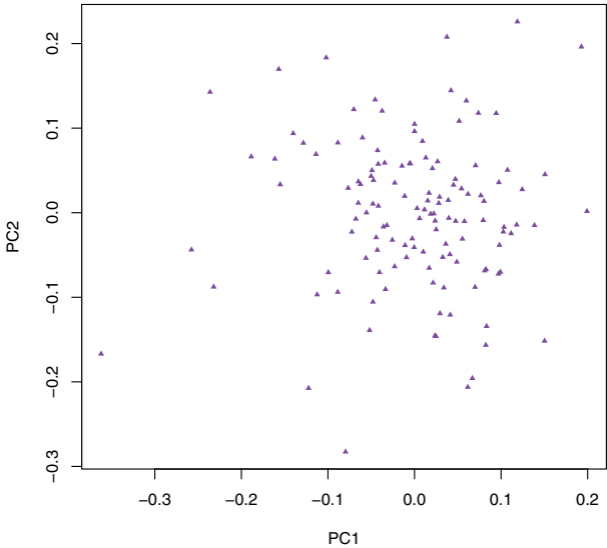

Supplement: 13059_2009_2291_MOESM6_ESM.pdf [file 13059_2009_2291_MOESM6_ESM.pdf]
